# Supplementary material
Source: publisher figshare collection journal article supplement (https://frontiersin.figshare.com/ndownloader/files/27526043)
Supplement: Supplementary file [file 27526043]

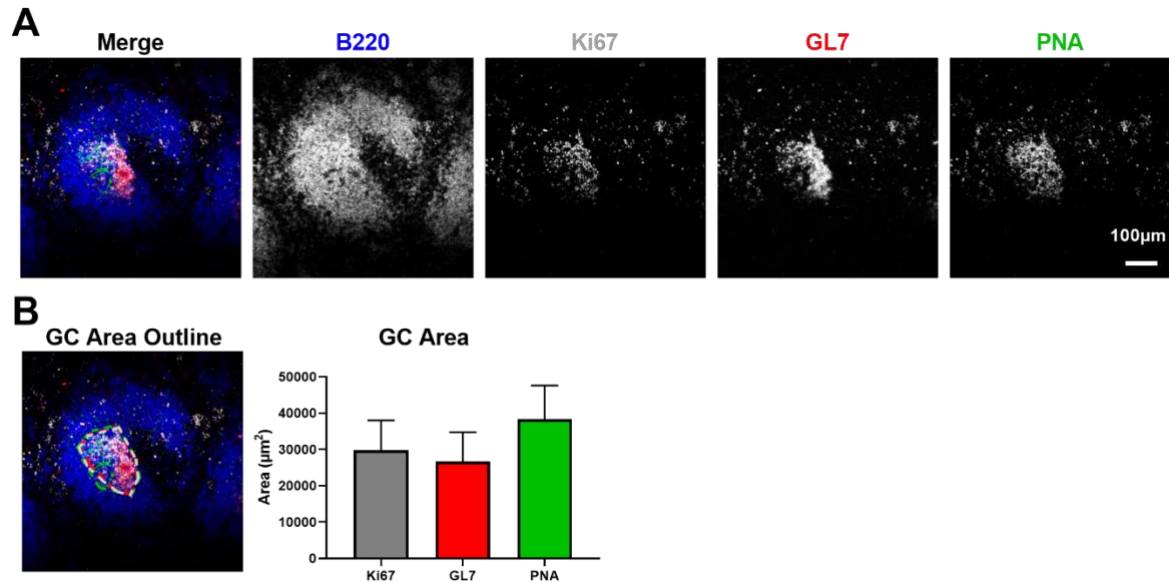

**Supplementary Figure 3. Germinal center staining comparison.** (A) Expanded representative images of spleen B cell follicle (B220, blue), containing a GC stained with Ki67 (grey) GL7 (red) and PNA (green). (B) Example GC ROI area outline of Ki67+ area (grey line), GL7+ area (red line) and PNA+ area (green line). GC area ( $\mu\text{m}^2 \pm \text{SEM}$ ) based on each GC marker. The data is representative of 3 mice from two independent experiments. Statistical differences between GC markers in B were determined by two-way ANOVA. \*\*\* p values < 0.001, \*\* < 0.01, and \* < 0.05.
